# Supplementary material
Source: PubMed Central journal article supplement (PMC1447647)
Supplement: nar_34_6_1925__1.pdf [file nar_34_6_1925__1.pdf]

# MolProbity Ramachandran analysis

bref11\_1\_clean.pdb, model 1

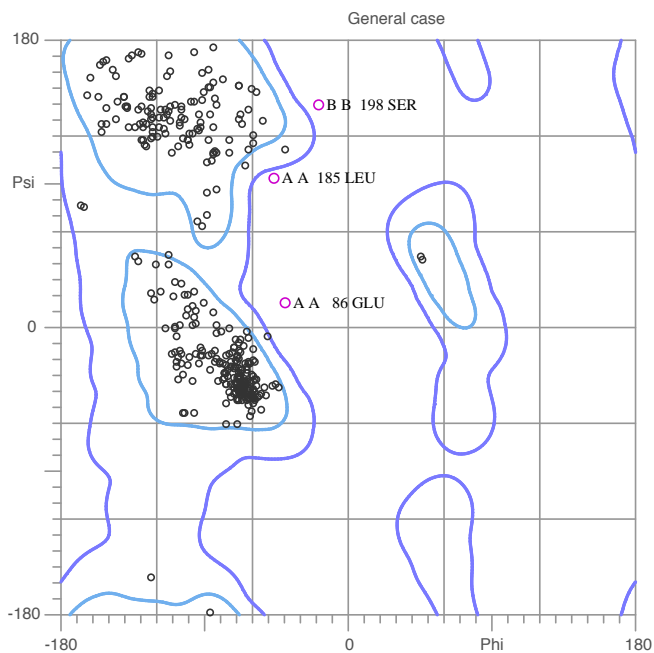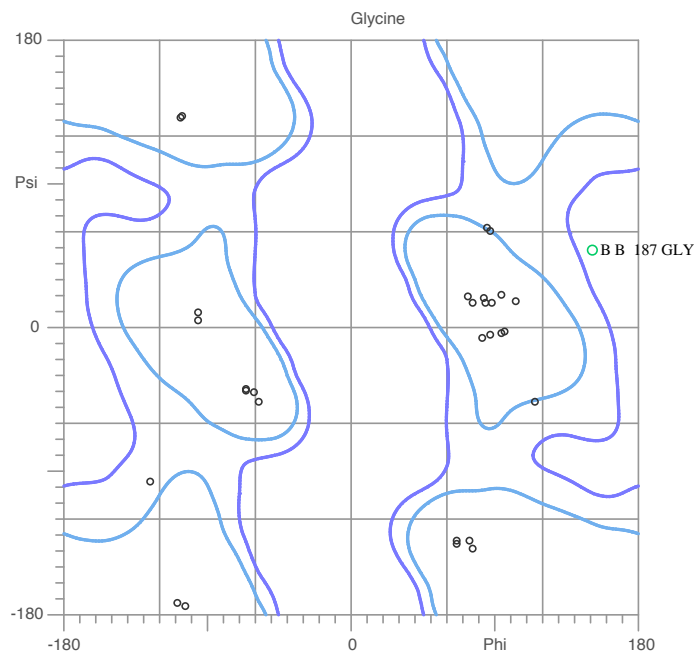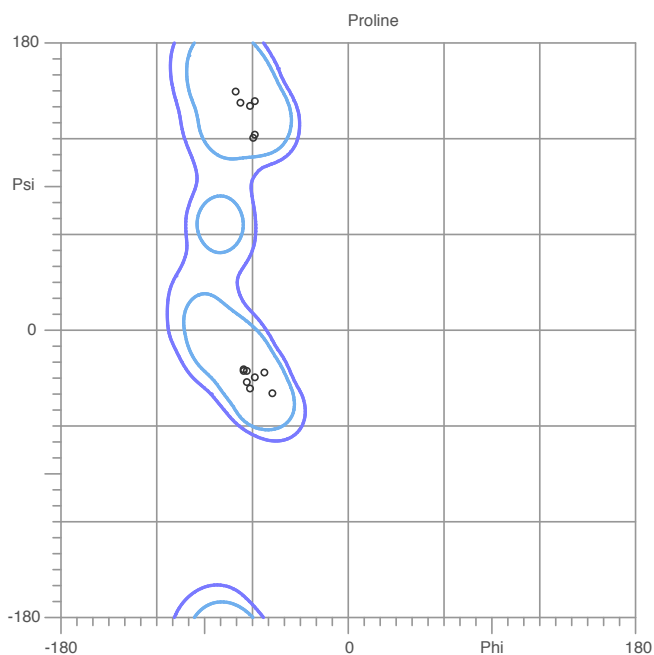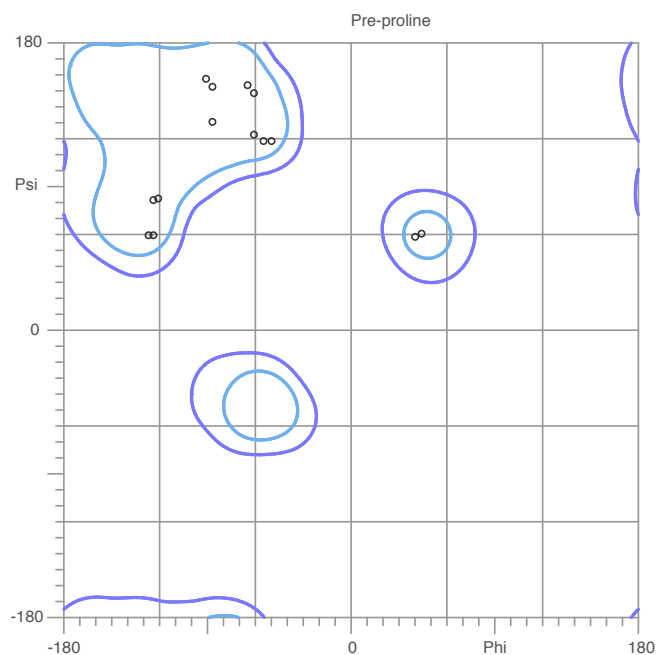

96.3% (389/404) of all residues were in favored (98%) regions.  
99.0% (400/404) of all residues were in allowed (>99.8%) regions.

There were 4 outliers (phi, psi):

A A 86 GLU (-40.8, 16.7)

A A 185 LEU (-47.7, 94.3)

B B 187 GLY (152.0, 49.0)

B B 198 SER (-20.0, 140.4)
